# Supplementary material for: Molecular Mechanism by Which AMP-Activated Protein Kinase Activation Promotes Glycogen Accumulation in Muscle
Source: PubMed Central journal article supplement — Diabetes. 2011 Feb 21;60(3):766–74. doi: 10.2337/db10-1148 (PMC3046837; doi:10.2337/db10-1148), 2011-02-21

SUPPLEMENTARY DATA

**Supplementary Figure 1. GSK3 inhibition modestly improves glycogen synthesis in AICAR-stimulated  $GS^{R582A/R582A}$  muscles.** EDL muscles from the indicated genotypes were incubated with either vehicle (0.2 % DMSO) or 3  $\mu$ M CT99021 (GSK3 selective inhibitor) in the presence of buffer (resting) or 2 mM AICAR in KRB containing D-[U- $^{14}$ C]glucose (5.5 mM) for 40 min. Glycogen synthesis was assayed as described in the Research Design and Methods.

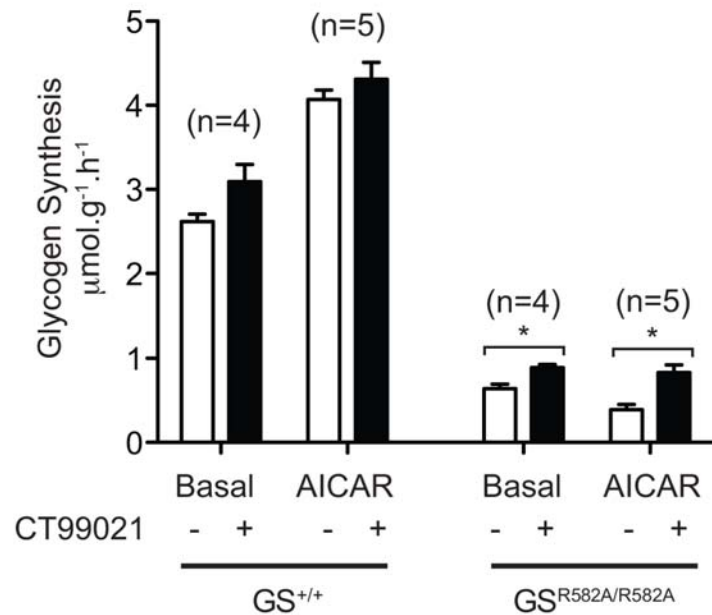

SUPPLEMENTARY DATA

**Supplementary Figure 2. G6P does not significantly influence AMPK-mediated phosphorylation of Ser8 GS.** Baculovirus-expressed muscle glycogen synthase (GS):GST-glycogenin-1 complex was dephosphorylated *in vitro* with recombinant PP1 $\gamma$  in 50 mM HEPES pH 7.4, 1 mM MnCl<sub>2</sub>, 0.1 mM EGTA and 1 mM DTT for 30 min at 30° C. PP1 was blocked using 1  $\mu$ M microcystin-LR and the GS preparation was phosphorylated *in vitro* with recombinant AMPK $\alpha$ 2 $\beta$ 2 $\gamma$ 1 complex produced in E.coli activated with CaMKK $\beta$  (active AMPK $\alpha$ 2 $\beta$ 2 $\gamma$ 1 complex was donated by D. Grahame Hardie, University of Dundee). Briefly, 100 ng GS was incubated with 50 mM HEPES pH 7.4, 0.1 % (w/v) glycogen, 0.1 mM AMP, 10 mM MgCl<sub>2</sub>, 5 mU AMPK (assayed against AMARA peptide) and varying concentrations of G6P for 5 min at 30 °C. 5 mU recombinant protein kinase A (PKA) catalytic subunit (Promega) was used as a positive control. The reaction was started by the addition of 0.2 mM ATP, incubated for a further 20 min at 30° C and stopped by the addition of SDS sample buffer. Reactions were separated by SDS-PAGE and blotted for pSer8 and total GS. Results are representative of two independent experiments.

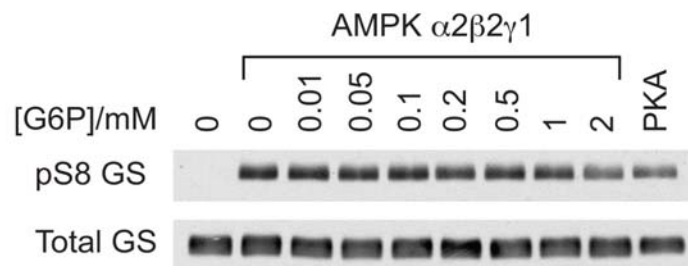

Supplement: supp_db10-1148_DB101148SupplementaryData.pdf [file supp_db10-1148_DB101148SupplementaryData.pdf]
